# Supplementary material
Source: ML conference proceedings conference paper supplement (https://openreview.net/forum?id=u6Xv3FuF8N)
Supplement: supplementary_material [file attachment]

## 517 A Broader Impacts

518 The growing importance of in-context learning as a paradigm for leveraging LLMs on private  
519 downstream tasks has significant implications for privacy. We present the first approaches for  
520 obtaining prompts with privacy guarantees, thereby enabling the use of this learning paradigm on  
521 sensitive data. This advancement has the potential to increase trust and acceptance of LLM-based  
522 systems for private applications. Our approach PromptPATE is the first viable technique for private  
523 downstream adaptation of black-box LLMs, which enables integrations into the state-of-the-art  
524 commercial LLM APIs. We acknowledge that—as with any application that relies on DP—care must  
525 be taken when choosing the privacy parameters  $\varepsilon$  and  $\delta$  since setting these incorrectly can lead to  
526 a false sense of privacy. Therefore, our work orientates at the privacy parameters that have been  
527 shown to provide reasonable protection in prior work. Thereby, we also ensure consistency and  
528 comparability in evaluations between the different approaches.

## 529 B Limitations

530 **Tuning Instructions and Templates.** For our discrete prompts, we did not tune the instructions or  
531 templates but instead relied on a template from prior work [58]. The effectiveness and performance  
532 of our PromptPATE could potentially be further improved by tuning the instructions and templates.

533 **Privacy Risk of Pretrained LLM:** We build on pretrained LLMs to learn and deploy our private  
534 prompts. Our methods solely target the protection of the private data used for these prompts. However,  
535 it is also important to acknowledge the inherent privacy risks for data used to pretrain the LLM. We  
536 leave the pretraining of LLMs with privacy guarantees to an orthogonal line of work.

537 **Limited Monetary Budget for our Experiments.** Due to cost limitations, we were unable to  
538 experiment with the latest and best available model, GPT4. Our experiments with GPT3-Curie in  
539 comparison to less powerful GPT3-Babbage however indicate the clear trend the our private prompts  
540 improve in performance as the non-private baseline improves due to better models. Furthermore,  
541 again due to the cost limitation, we were not able to incorporate a larger number of teachers in our  
542 experiments for PromptPATE. Therefore, the best non-private teacher baseline that we report might  
543 not be the best achievable if one had more teachers to choose from. We chose from 200 and note  
544 that with more (and potentially better teachers), not only the baseline but also the teacher ensemble’s  
545 performance would get better.

546 **Hyperparameter Tuning.** To save computation costs, we did not exhaustively tune all hyperpa-  
547 rameters in our experiments. While our approach still achieves high utility and good privacy-utility  
548 trade-offs, we acknowledge that with more hyperparameter tuning the performance together with the  
549 understanding of optimal configurations for private prompt learning could increase.

550 **Assumption of a Trusted LLM API Provider.** In our work, the API provider gets to interact with  
551 the private data, for example, through the teachers’ prompts in PromptPATE. Therefore, we have  
552 to assume trust in the API provider. The privacy guarantees through our private prompt learning  
553 protect the privacy of the prompt data against users that interact with the prompted LLM. In practice,  
554 companies that are concerned about the privacy of their data with respect to the API provider could  
555 make contracts with the API providers on the use of their data or buy access plans that guarantee that  
556 data queried to the API is treated privately. We leave implementing cryptographic approaches that  
557 could relief the assumption on trusting the API provider entirely, for example, by enabling the LLM  
558 to run inference on encrypted private data to future work.

## 559 C Additional Insights into our Methods

### 560 C.1 PromptDPSGD

561 We present the full PromptDPSGD algorithm in Algorithm 1.

---

**Algorithm 1: PromptDPSGD.** In contrast to the standard DPSGD algorithm that updates model parameters during private training or fine-tuning, our PromptDPSGD privately updates the soft prompt parameters. We highlight these changes with respect to standard DPSGD training or fine-tuning in blue.

---

**Require:** Private downstream data  $D = \{(x_i, y_i) \mid i \in [N]\}$ , prompt sequence length  $s$ , embedding dimensionality  $e$ , trained LLM  $L$  with frozen parameters, loss function  $\ell(L_p, x)$  for prompted LLM, **Params:** learning rate  $\eta_t$ , noise scale  $\sigma$ , sampling rate  $q$ , max gradient norm  $c$ , training iterations  $T$ .

- 1: **Initialize**  $P_0 \in \mathbb{R}^{s \times e}$  at random
- 2: **for**  $t \in [T]$  **do**
- 3:   Sample mini-batch  $B_t$  according to sampling rate  $q$  from  $D$  {Poisson sampling}
- 4:   For each  $i \in |B_t|$ , compute  $\mathbf{g}_t(x_i) \leftarrow \nabla_{P_t} \ell(L_p, x_i)$  {Compute per sample gradient w.r.t.  $p_t$ }
- 5:    $\bar{\mathbf{g}}_t(x_i) \leftarrow \mathbf{g}_t(x_i) / \max\left(1, \frac{\|\mathbf{g}_t(x_i)\|_2}{c}\right)$  {Clip gradient}
- 6:    $\tilde{\mathbf{g}}_t \leftarrow \frac{1}{|B_t|} \left( \sum_i \bar{\mathbf{g}}_t(x_i) + \mathcal{N}(0, \sigma^2 c^2 \mathbf{I}) \right)$  {Add noise}
- 7:    $P_{t+1} \leftarrow P_t - \eta_t \tilde{\mathbf{g}}_t$  {Update soft prompt}
- 8: **end for**
- 9: **Output**  $p_T$  and compute the overall privacy cost  $(\varepsilon, \delta)$ .

---

## 562 C.2 PromptPATE

563 **Extended Background on PATE.** We include the standard Confident-GNMax Aggregator Algo-  
 564 rithm from [37] below.

---

**Algorithm 2: Confident-GNMax Aggregator by [37]**

---

**Require:** input  $x$ , threshold  $T$ , noise parameters  $\sigma_1$  and  $\sigma_2$

- 1: **if**  $\max_j \{\sum_{i \in [E]} n_{i,j}(x)\} + \mathcal{N}(0, \sigma_1^2) \geq T$  **then**
- 2:   **Output**  $\arg \max_j \{\sum_{i \in [E]} n_{i,j}(\mathbf{x}) + \mathcal{N}(0, \sigma_2^2)\}$
- 3: **else**
- 4:   **Output**  $\perp$
- 5: **end if**

---

## 565 C.3 Privacy Analysis

566 **PromptDPSGD.** Our PromptDPSGD can be seen as a repeated sampled Gaussian mechanism [1],  
 567 with sampling performed over the entirety of the private prompt dataset. The difference to standard  
 568 DPSGD for training or fine-tuning is that we do not update the model parameters, but the trainable  
 569 embeddings for the soft prompts. This is conceptually different from standard DPSGD in terms of  
 570 which parameters are updated. The privacy guarantees of the training mechanism still follow Abadi *et*  
 571 *al.* [1], but with respect to the soft prompt embeddings: whether or not a particular data point will be  
 572 included in the private training set used for tuning the prompt, the resulting soft prompt embeddings  
 573 after training will be roughly the same. Especially by applying the clipping operation at every step,  
 574 each mechanism’s sensitivity is bounded by  $c$ . Privacy is then implemented as the trainable soft  
 575 prompt embeddings are updated while adding noise drawn from  $\mathcal{N}(0, c^2 \sigma^2 I)$ .

576 **Theorem 1** (Privacy of PromptDPSGD). *Let  $T$  be the total number of repetitions (training iterations)*  
 577 *of our PromptDPSGD and the sampling rate be denoted by  $q$ . Then, there exist two constants  $c_1$*   
 578 *and  $c_2$ , such that for any  $\varepsilon < c_1 q^2 T$  our PromptDPSGD guarantees  $(\varepsilon, \delta)$ -DP, if for any  $\delta > 0$ , we*  
 579 *choose the noise according to  $\sigma \geq c_2 \frac{qc\sqrt{T \log 1/\delta}}{\varepsilon}$ .*

580 *Proof.* The proof follows the one by Abadi *et al.* [1], using their moments accountant that models the  
 581 privacy loss as a random variable dependent on the stochastic noise added.  $\square$

582 **PromptPATE.** Our PromptPATE relies entirely on the Confident GNMAX algorithm from Pa-  
 583 pernot *et al.* [37]. We preserve the assumption underlying the algorithm and the respective privacy  
 584 analysis that the sensitivity during the voting mechanism equals one. This is done in PromptPATE  
 585 by assigning *disjoint* data points from the private prompt downstream dataset to all teachers. As a  
 586 consequence, the privacy analysis of our PromptPATE entirely follows Papernot *et al.* [37].

Both our PromptDPSGD and PromptPATE experience the post-processing properties of DP, *i.e.*, once trained, the privacy guarantee  $(\epsilon, \delta)$  sets an upper bound on privacy leakage for the prompt data, independent on the number and type of queries that will be posed to the final prompted LLM.

## D Additional Results

### D.1 Membership Inference Attacks

We present the full results of MIA against GPT3 with one-shot prompts on 4 datasets in 4.

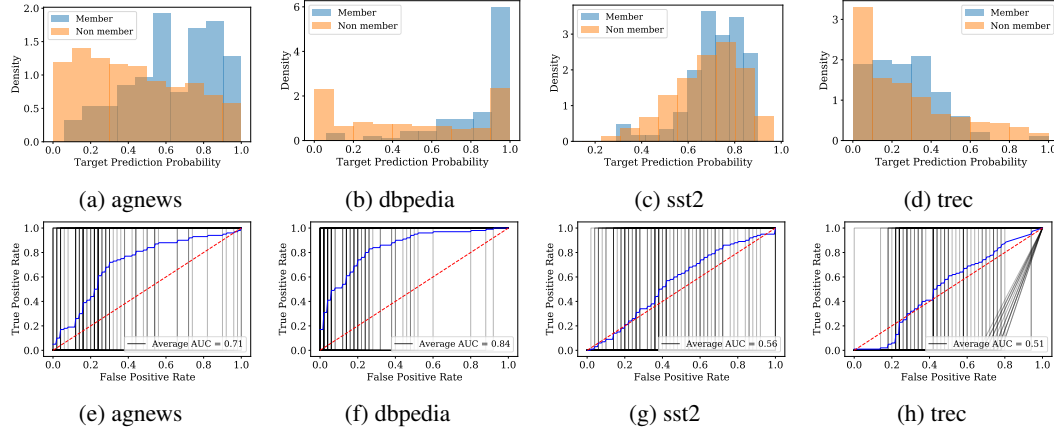

Figure 4: **MIA Risk over Multiple Datasets on GPT3.** We study GPT3-babbage prompted with 100 different one-shot examples on four datasets. *top*: We present the prediction probabilities at the correct class for members (the one-shot example) and non-members (50 randomly sampled private points). The output probability for members is significantly higher than for non-member data points. *bottom*: We present the AUC-ROC curves of our MIA against the 100 prompts (gray lines) and the blue line as an average over all attacks. Given that each prompt has only one member, the resulting TPRs can only be 0% or 100% which leads to the step-shape of the gray curves. The result indicates that our attack is significantly more successful than random guessing (the red dashed line).

In addition, we also perform similar experiments on GPT2-xl with four-shot examples, with results presented in Figure 5. We replace dbpedia with cb because the input in dbpedia is usually longer than the context length of GPT2.

### D.2 PromptPATE on Claude

We present the experiment results of PromptPATE on Claude 3. Different from GPT3 that outputs logits over the whole vocabulary, Claude only gives us access to the next most likely token.

**Experimental Setup. Teachers:** We rely on Claude-v1 as the base LLM. We use 2-shot prompts for sst2 and agnews, 4-shot for trec and 1-shot for dbpedia. We set the maximum generated tokens to 1 and temperatures to 0. We also create an "other" category in case the model's output does not fall under any specified categories. For each setting, we deploy 400 teacher prompts. **Private knowledge transfer:** We use the implementation of PATE's Confident GNMAX algorithm and the privacy accounting from 12 and report our algorithm's hyperparameters in Appendix E. **Student:** We limit the size of the public dataset to 200 input sequences from the respective datasets. The number of shots for students corresponds with the teachers.

### D.3 More results for PromptDPSGD

We present the additional results for PromptDPSGD with  $\epsilon = 3$  on the classification tasks in Table 5.

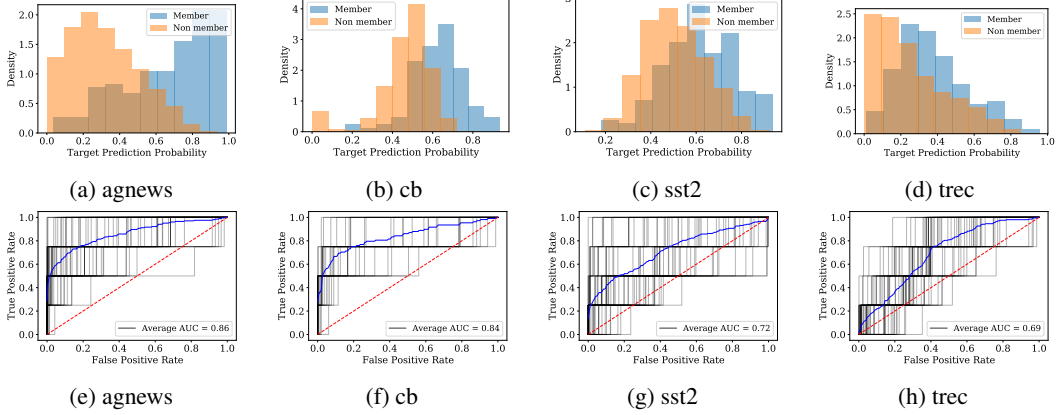

Figure 5: **MIA Risk over Multiple Datasets on GPT2-xl (4 shot).** We study GPT2-xl prompted with 100 different four-shot examples on four datasets. *top*: We present the prediction probabilities at the correct class for members (the one-shot example) and non-members (50 randomly sampled private points). The output probability for members is significantly higher than for non-member data points. *bottom*: We present the AUC-ROC curves of our MIA against the 100 prompts (gray lines) and the blue line as an average over all attacks. Given that each prompt has only one member, the resulting TPRs can only be 0%, 25%, 50%, 75% or 100% which leads to the step-shape of the gray curves. The result indicates that our attack is significantly more successful than random guessing (the red dashed line).

|         | Lower Bound       | Ens. Acc.              | Upper Bound            | Our PromptPATE |               |                |
|---------|-------------------|------------------------|------------------------|----------------|---------------|----------------|
| Private | $\varepsilon = 0$ | $\varepsilon = \infty$ | $\varepsilon = \infty$ | Public         | $\varepsilon$ | Test acc       |
| sst2    | 92.7              | 96.0                   | 98.0                   | sst2           | 0.048         | $95.7 \pm 1.4$ |
| agnews  | 72.4              | 79.1                   | 82.7                   | agnews         | 0.056         | $74.6 \pm 1.5$ |
| trec    | 69.0              | 79.9                   | 82.2                   | trec           | 0.068         | $79.3 \pm 1.2$ |
| dbpedia | 88.0              | 92.4                   | 93.5                   | dbpedia        | 0.042         | $90.9 \pm 0.6$ |

Table 3: **Performance of PromptPATE on Claude.** We compare PromptPATE with three baselines: zero-shot (Lower Bound), the ensemble’s accuracy (Ens. Acc), and the non-private baseline (Upper Bound) on four classification benchmarks. We find that PromptPATE achieves strong privacy protection ( $\varepsilon < 0.1$  at  $\delta = 10^{-6}$ ) and utility close to the non-private and significantly higher than the zero-shot.

## 609 E Additional Setup

### 610 E.1 PromptDPSGD

611 We train PromptDPSGD on NVIDIA A100 GPUs. We execute (hyper-)parameter search that takes  
612 into account learning rate (LR), max grad norm (GRAD), number of epochs (Epochs), the token  
613 length of prefix and prompt. In general, we find that the prompt and prefix token length of 10 is close  
614 to the optimal value in most cases. For the private (hyper-)parameters, in most cases we tune for  
615  $\varepsilon = 8$  and use similar (or even the same) parameters for other  $\varepsilon$  values. We set the max grad norm to  
616 0.1 in most cases and then adjust the number of epochs (the more the better, for example, 100), and  
617 the learning rate [54]<sup>3</sup>. The batch size is set by default to 1024.

618 We show the specific parameters chosen for PromptDPSGD in Table 6.

<sup>3</sup>We would like to thank the authors of [54] for their help, especially for the very useful and practical pieces of advice on how to tune the parameters for differential privacy from Huseyin A. Inan.

| Dataset | M | Soft-Prompt (Our) |                        | Prefix (Our)      |                        | Full-Tuning [25]  |                        | LoRA-Tuning [54]  |                        |
|---------|---|-------------------|------------------------|-------------------|------------------------|-------------------|------------------------|-------------------|------------------------|
|         | P | <10K              |                        | <100K             |                        | 125M              |                        | 1.2M              |                        |
|         | G | $\varepsilon = 3$ | $\varepsilon = \infty$ |
| SST2    |   | 90.48             | 95.64                  | 90.37             | 96.33                  | 91.86             | 96.40                  | 92.60             | 96.60                  |
| QNLI    |   | 83.62             | 89.48                  | 86.05             | 94.84                  | 87.42             | 94.70                  | 86.97             | 94.70                  |
| QQP     |   | 80.29             | 86.56                  | 80.89             | 91.42                  | 85.56             | 92.20                  | 85.12             | 92.20                  |
| MNLI    |   | 73.97             | 82.49                  | 80.10             | 90.34                  | 82.99             | 90.20                  | 82.08             | 90.20                  |

Table 4: **Private classification with soft prompts and prefix for  $\varepsilon = \{3, \infty\}$  and the RoBERTa<sub>BASE</sub> model.** We use the same setup and notation as in Table 1.

| Dataset | M | Soft-Prompt (Our) |  | Prefix (Our) |  | Full-Tuning [25] |  |
|---------|---|-------------------|--|--------------|--|------------------|--|
|         | P | <10K              |  | <100K        |  | 125M             |  |
| SST2    |   | 90.37             |  | 93.58        |  | 90.94            |  |
| QNLI    |   | 87.62             |  | 89.45        |  | 89.42            |  |
| QQP     |   | 82.29             |  | 83.50        |  | 87.49            |  |
| MNLI    |   | 76.05             |  | 86.40        |  | 86.28            |  |

Table 5: **Private classification with soft prompts and prefix for  $\varepsilon = 8$  and the RoBERTa<sub>LARGE</sub> model.** We use the same setup and notation as in Table 1.

## 619 E.2 PromptPATE

### 620 E.2.1 Hyperparameters for Confident-GNMax

621 We present our hyperparameters for Confident-GNMax in Table 7.

### 622 E.2.2 Dataset Preprocessing

623 sst2, trec, agnews, dbpedia and cb are taken from the repo of [58]. All other public datasets are  
624 downloaded from huggingface. To reduce the cost of querying APIs, we randomly sample 300 points  
625 from the test set to report the test accuracy. For imdb, we random select one sentence from each entry  
626 and also remove the <br/> tag. For qqp, we only take the column of "question 1" in the public set.

| Dataset | Method | RoBERTa | BS   | LR    | $\varepsilon$ | GRAD | Epochs | P-Length | Accuracy (%) |
|---------|--------|---------|------|-------|---------------|------|--------|----------|--------------|
| SST2    | Prompt | Base    | 1024 | 0.005 | $\infty$      | N/A  | 60     | 100      | 93.23        |
| SST2    | Prompt | Base    | 900  | 0.05  | 8             | 0.01 | 21     | 9        | 92.32        |
| SST2    | Prompt | Base    | 1024 | 0.005 | 3             | 0.05 | 100    | 10       | 86.35        |
| SST2    | Prompt | Large   | 2048 | 0.005 | 8             | 4    | 100    | 10       | 90.37        |
| SST2    | Prefix | Base    | 32   | 0.01  | $\infty$      | N/A  | 60     | 20       | 94.61        |
| SST2    | Prefix | Base    | 1000 | 0.05  | 8             | 4    | 22     | 1        | 91.97        |
| SST2    | Prefix | Base    | 1024 | 0.01  | 3             | 0.2  | 100    | 50       | 90.37        |
| SST2    | Prefix | Large   | 2048 | 0.05  | 8             | 4    | 22     | 1        | 93.58        |
| <hr/>   |        |         |      |       |               |      |        |          |              |
| QNLI    | Prompt | Base    | 1024 | 0.005 | $\infty$      | N/A  | 60     | 128      | 89.48        |
| QNLI    | Prompt | Base    | 1024 | 0.005 | 8             | 0.05 | 100    | 10       | 84.11        |
| QNLI    | Prompt | Base    | 1024 | 0.005 | 3             | 0.1  | 100    | 50       | 83.62        |
| QNLI    | Prompt | Large   | 2048 | 0.01  | 8             | 0.05 | 100    | 10       | 87.62        |
| QNLI    | Prefix | Base    | 1024 | 0.005 | $\infty$      | N/A  | 60     | 20       | 94.84        |
| QNLI    | Prefix | Base    | 1000 | 0.03  | 8             | 0.07 | 22     | 10       | 88.77        |
| QNLI    | Prefix | Base    | 1024 | 0.01  | 3             | 0.2  | 100    | 50       | 85.78        |
| QNLI    | Prefix | Large   | 2048 | 0.03  | 8             | 0.07 | 22     | 10       | 89.45        |
| <hr/>   |        |         |      |       |               |      |        |          |              |
| QQP     | Prompt | Base    | 1024 | 0.005 | $\infty$      | N/A  | 60     | 50       | 86.64        |
| QQP     | Prompt | Base    | 1024 | 0.05  | 8             | 0.1  | 10     | 7        | 82.58        |
| QQP     | Prompt | Base    | 1024 | 0.001 | 3             | 0.01 | 100    | 15       | 80.29        |
| QQP     | Prompt | Large   | 2048 | 0.005 | 8             | 0.05 | 100    | 10       | 82.29        |
| QQP     | Prefix | Base    | 1024 | 0.005 | $\infty$      | N/A  | 60     | 20       | 91.42        |
| QQP     | Prefix | Base    | 1024 | 0.05  | 8             | 0.1  | 10     | 7        | 82.59        |
| QQP     | Prefix | Base    | 1024 | 0.05  | 3             | 1    | 15     | 2        | 80.89        |
| QQP     | Prefix | Large   | 2048 | 0.05  | 8             | 0.1  | 10     | 7        | 83.50        |
| <hr/>   |        |         |      |       |               |      |        |          |              |
| MNLI    | Prompt | Base    | 32   | 0.001 | $\infty$      | N/A  | 60     | 20       | 82.49        |
| MNLI    | Prompt | Base    | 1024 | 0.005 | 8             | 0.05 | 60     | 10       | 75.01        |
| MNLI    | Prompt | Base    | 1024 | 0.005 | 3             | 0.05 | 100    | 10       | 73.97        |
| MNLI    | Prompt | Large   | 2048 | 0.005 | 8             | 0.2  | 60     | 10       | 76.05        |
| MNLI    | Prefix | Base    | 32   | 0.001 | $\infty$      | N/A  | 60     | 20       | 82.49        |
| MNLI    | Prefix | Base    | 1024 | 0.005 | 8             | 0.05 | 60     | 50       | 80.42        |
| MNLI    | Prefix | Base    | 1024 | 0.005 | 3             | 0.2  | 100    | 50       | 80.10        |
| MNLI    | Prefix | Large   | 2048 | 0.01  | 8             | 0.1  | 100    | 10       | 86.40        |

Table 6: **Detailed parameters for soft prompts and prefix.** Type is the type of training, BS represents the batch size, LR denotes the learning rate,  $\varepsilon$  is the DP guarantee, P-Length is the token length of soft-prompt or prefix.

| LLM    | Dataset | $T$ | $\sigma_1$ | $\sigma_2$ |
|--------|---------|-----|------------|------------|
| GPT3   | sst2    | 180 | 1          | 20         |
| GPT3   | agnews  | 180 | 5          | 20         |
| GPT3   | trec    | 180 | 1          | 20         |
| GPT3   | dbpedia | 170 | 1          | 20         |
| <hr/>  |         |     |            |            |
| Claude | sst2    | 390 | 1          | 50         |
| Claude | agnews  | 360 | 1          | 50         |
| Claude | trec    | 320 | 1          | 50         |
| Claude | dbpedia | 320 | 5          | 50         |

Table 7: **Detailed parameters for Confident-GNMax.**
